# Supplementary material for: Transcriptome analysis of alternative splicing events regulated by SRSF10 reveals position-dependent splicing modulation
Source: PubMed Central journal article supplement — Nucleic Acids Res. 2014 Jan 17;42(6):4019–30. doi: 10.1093/nar/gkt1387 (PMC3973337; doi:10.1093/nar/gkt1387), 2014-01-17
Supplement: supp_gkt1387_nar-02202-a-2013-File010.pdf [file supp_gkt1387_nar-02202-a-2013-File010.pdf]

# Supplementary data

## Transcriptome Analysis of Alternative Splicing Events Regulated by SRSF10 Reveals Position-Dependent Splicing Modulation

Xuexia Zhou<sup>1#</sup>, Wenwu Wu<sup>1#</sup>, Huang Li<sup>1</sup>, Yuanming Cheng<sup>1</sup>, Ning Wei<sup>1</sup>, Jie Zong<sup>2</sup>,  
Xiaoyan Feng<sup>1</sup>, Zhiqin Xie<sup>1</sup>, Dai Chen<sup>2</sup>, James L. Manley<sup>3</sup>, Hui Wang<sup>1,4</sup> and Ying  
Feng<sup>1,4\*</sup>

<sup>1</sup>Key Laboratory of Food Safety Research, Institute for Nutritional Sciences, Shanghai Institutes for Biological Sciences, Chinese Academy of Sciences, Shanghai 200031, China.

<sup>2</sup>Novel Bioinformatics Co., Ltd, Shanghai, China

<sup>3</sup>Department of Biological Sciences, Columbia University, New York, NY 10027, USA

<sup>4</sup>Key Laboratory of Food Safety Risk Assessment, Ministry of Health, Beijing 100021, China.

# these authors contributed equally to this work

\* To whom correspondence should be addressed. Tel: +86-21-54920965; Fax : +86-21-54920965; Email : [fengying@sibs.ac.cn](mailto:fengying@sibs.ac.cn)

The authors declare no conflict of interest.

**This PDF file includes:** Supplementary Figures S1-S4, Supplementary Tables S1-S3 and one Supplementary Method.

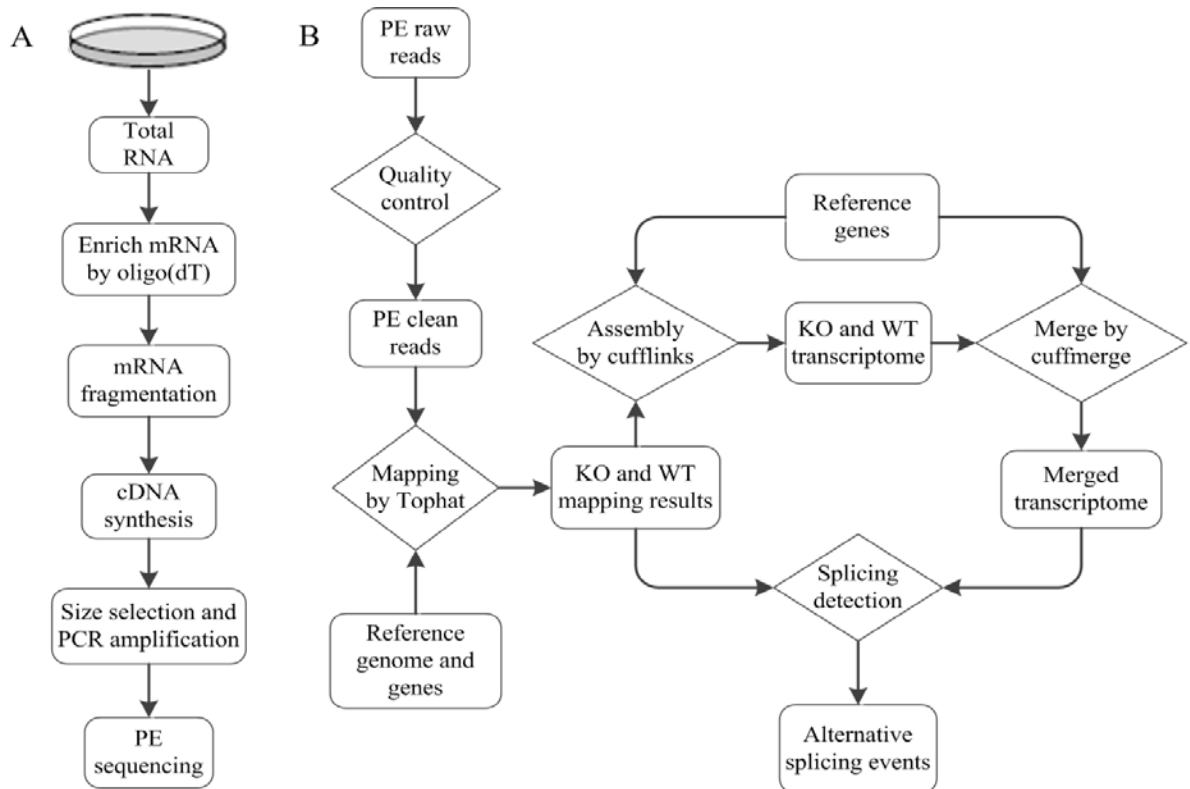

**Supplementary Figure S1. Experimental design and bioinformatics pipelines.** (A) General strategy for RNA sequencing. Total RNA was isolated from KO and WT cells and prepared for paired-end sequencing. (B) Bioinformatics analysis.

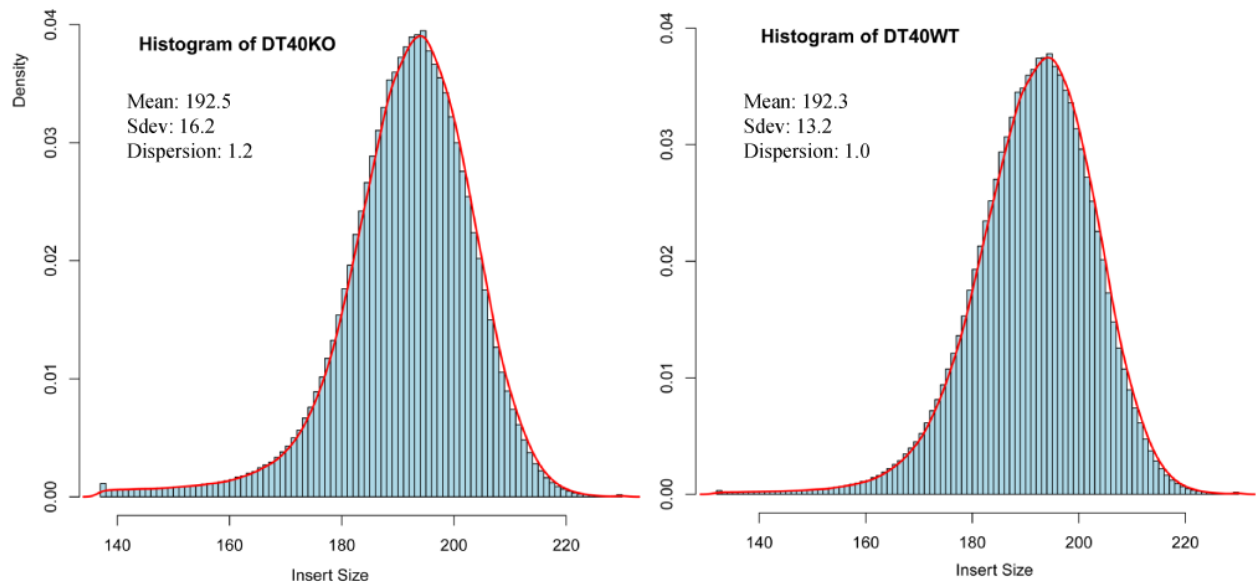

**Supplementary Figure S2. Distribution of insert size for mapping paired-end reads.** Distribution of the insert size of the libraries as determined by alignment to gal4 genome and transcriptome.

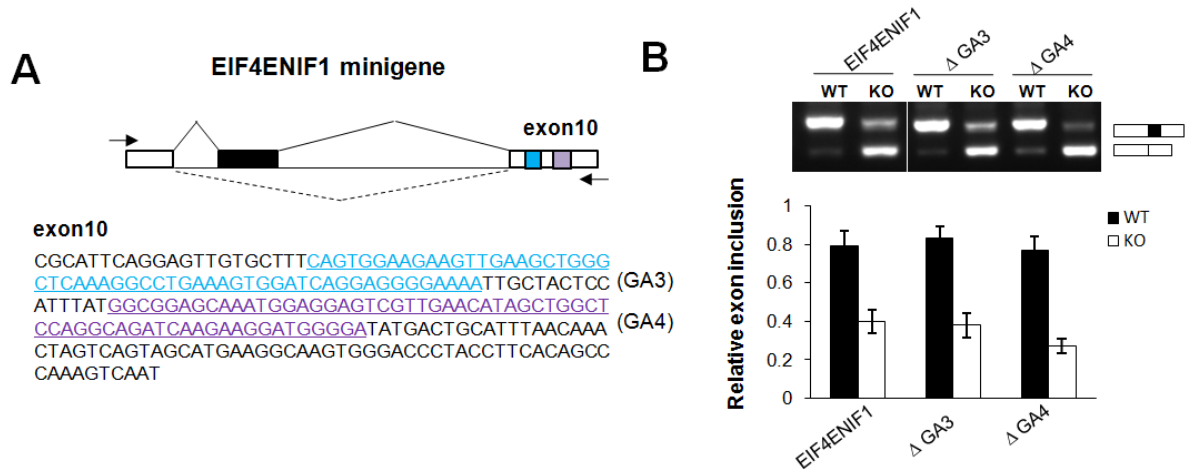

**Supplementary Figure S3. Characteristics of SRSF10-regulated exon inclusion.** (A) Schematic representation of the EIF4ENIF1 minigene construct (top). The exon 10 sequences are shown at the bottom, with two GA-rich motifs (GA3 and GA4), each marked with a different color. (B) RT-PCR analysis of the KDM6A minigene or each of indicated mutants transfected in WT or KO cells, respectively. The histogram below shows mean the percentage of exon inclusion  $\pm$  SD,  $n=3$ .

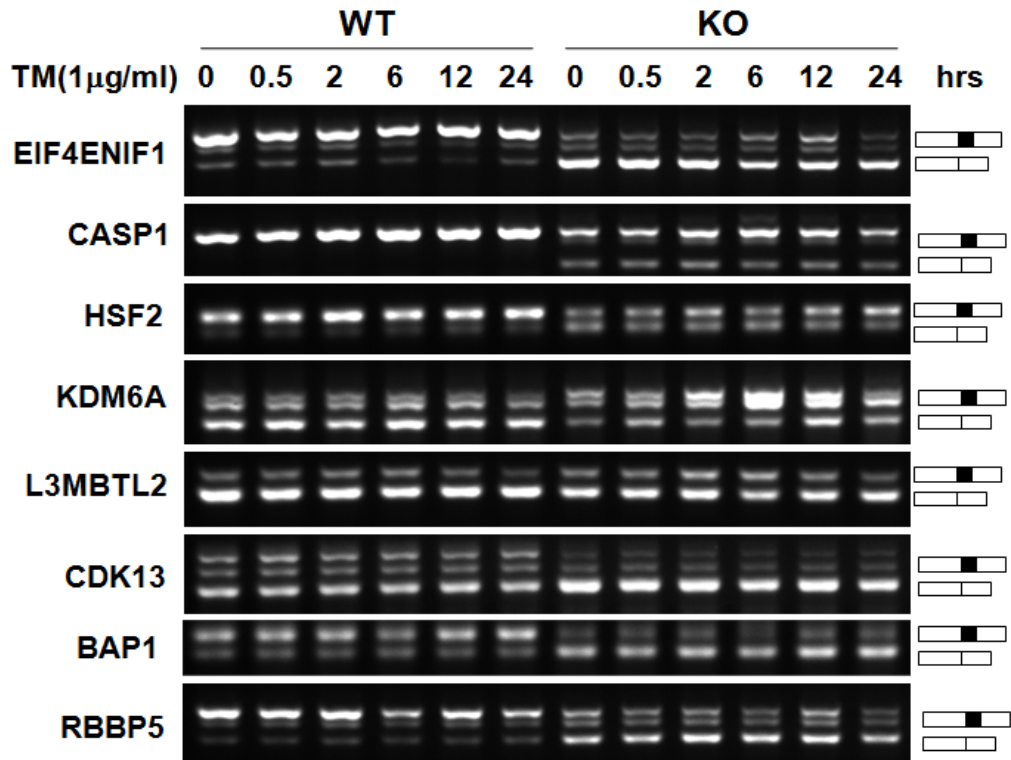

**Supplementary Figure S4. RT-PCR analysis was performed on the SRSF10-dependent exon inclusion or skipping events under ER stress conditions. WT and KO cells were subjected to TM-induced ER stress for the indicated times followed by RT-PCR analysis.**

## Supplementary Method

The equation used in the current study is:

$$Pvalue_{adjusted} = w \times Pvalue_{first} + (1 - w) \times Pvalue_{second} \quad (1)$$

Where  $w$  indicates the weight of the  $Pvalue_{first}$  on detection of differential alternative splicing events and its value depends on the size of an alternative exon and RNA-seq read length. To determine the value for  $w$ , another variable was introduced and calculated by:

$$R = \frac{E_i}{3R_i} \quad (2)$$

Where  $E_i$  and  $R_i$  indicates the size for an alternative exon and the length of RNA-seq reads, respectively. If  $R$  is bigger than one, the weight  $w$  is determined by  $0.5^{\frac{1}{R}}$ . In the case of  $R$  less than one,  $w$  is determined by  $1 - 0.5^R$ .

**Supplementary Table S1. List of significant alternative splicing events affected by SRSF10**

| Gene Symbol | Exon coordinates                  | Reads coverage (Ex::In) |          | adjusted P-Value | AS type   |
|-------------|-----------------------------------|-------------------------|----------|------------------|-----------|
|             |                                   | WT                      | KO       |                  |           |
| MKS1        | chr19_JH375211_random:12727-13238 | 254::0                  | 0::249   | 6.14E-76         | alt5      |
| PHF20L1     | chr2:141308382-141308600          | 40::241                 | 134::88  | 1.84E-13         | cassette  |
| EPRS        | chr3:18200072-18200150            | 122::168                | 0::214   | 8.31E-12         | cassette  |
| KIFC1       | chr16:289927-289966               | 72::0                   | 60::314  | 8.89E-08         | alt5      |
| CLASP2      | chr2:45303179-45303202            | 44::74                  | 35::4    | 1.39E-06         | cassette  |
| SLTM        | chr10:6388345-6388505             | 344::214                | 305::367 | 5.89E-05         | cassette  |
| TRIP12      | chr9:9598618-9598656              | 121::49                 | 172::13  | 1.84E-04         | cassette  |
| BAP1        | chr12:3106991-3107151             | 73::112                 | 109::27  | 1.97E-04         | alt5      |
| BAG4        | chr22:2270319-2270423             | 149::33                 | 116::115 | 2.09E-04         | cassette  |
| ARNT        | chr25:1718589-1718654             | 32::29                  | 30::97   | 2.31E-04         | cassette  |
| SLMAP       | chr12:8799021-8799077             | 43::343                 | 69::120  | 2.51E-04         | cassette  |
| EWSR1       | chr15:11167082-11167159           | 336::32                 | 175::60  | 2.62E-04         | cassette  |
| PIP5K1B     | chrz:34371671-34371754            | 34::2                   | 9::11    | 3.73E-04         | cassette  |
| INTS4       | chr1:192088711-192089002          | 35::0                   | 25::15   | 4.44E-04         | alt5      |
| GPR107      | chr17:5827330-5827529             | 21::0                   | 20::33   | 5.58E-04         | cassette  |
| RBBP5       | chr26:1959308-1959502             | 73::19                  | 52::38   | 5.92E-04         | alt5      |
| EIF4ENIF1   | chr15:8990976-8991155             | 0::47                   | 17::26   | 6.54E-04         | cassette  |
| CDK13       | chr2:50540721-50540901            | 82::119                 | 116::50  | 6.97E-04         | alt3      |
| R3HDM1      | chr7:30093934-30094023            | 241::164                | 136::33  | 7.77E-04         | Undefined |
| KDM6A       | chr1:110202915-110203049          | 37::37                  | 20::103  | 8.71E-04         | cassette  |
| HSF2        | chr3:60784335-60784388            | 79::587                 | 97::309  | 8.96E-04         | cassette  |

|          |                          |          |          |             |           |
|----------|--------------------------|----------|----------|-------------|-----------|
| CASP1    | chr19:706695-706847      | 0::34    | 7::30    | 9.28E-04    | cassette  |
| CAST     | chrZ:56851658-56851741   | 4::37    | 20::34   | 9.64E-04    | cassette  |
| MDM4     | chr26:1767300-1767361    | 28::39   | 25::69   | 9.93E-04    | cassette  |
| KIFC1    | chr16:228615-228653      | 72::68   | 60::461  | 0.001357388 | cassette  |
| NCAPG2   | chr2:9476774-9476836     | 180::72  | 113::109 | 0.00156482  | cassette  |
| GART     | chr1:104769317-104769435 | 204::30  | 243::10  | 0.001672557 | cassette  |
| PHF20    | chr20:930580-930708      | 65::55   | 68::134  | 0.002039575 | cassette  |
| DNAJC13  | chr2:42857095-42857109   | 49::7    | 82::55   | 0.002059832 | cassette  |
| R3HDM1   | chr7:30105687-30105737   | 215::507 | 134::137 | 0.002572598 | cassette  |
| GALNT2   | chr3:39602674-39602742   | 37::32   | 90::16   | 0.002758002 | cassette  |
| ADD1     | chr4:81866456-81866489   | 112::29  | 122::0   | 0.003207223 | cassette  |
| UBN1     | chr14:13240523-13240666  | 17::22   | 4::78    | 0.003341427 | cassette  |
| ARHGAP17 | chr14:6571318-6571560    | 49::57   | 57::19   | 0.003487858 | cassette  |
| SPTAN1   | chr17:5162818-5162877    | 55::44   | 80::12   | 0.00433839  | cassette  |
| BCOR     | chr1:111738445-111738498 | 50::23   | 60::68   | 0.004569101 | cassette  |
| BANP     | chr11:17497677-17497748  | 27::0    | 16::11   | 0.004578728 | cassette  |
| ATP2C1   | chr2:42272625-42272707   | 133::8   | 98::20   | 0.004714597 | cassette  |
| CCDC6    | chr6:8567839-8567933     | 278::104 | 282::52  | 0.004903683 | cassette  |
| L3MBTL2  | chr1:49618440-49618505   | 183::80  | 98::120  | 0.005649912 | cassette  |
| EIF4G3   | chr21:6653638-6653670    | 98::223  | 85::82   | 0.005741709 | cassette  |
| ARID1B   | chr3:50721969-50722127   | 21::109  | 44::63   | 0.006034    | cassette  |
| DIAPH1   | chr4:5922036-5922068     | 50::41   | 61::17   | 0.006475045 | cassette  |
| PRPF40A  | chr7:35050583-35050717   | 165::607 | 250::356 | 0.006943288 | cassette  |
| LRRFIP2  | chr2:49641926-49641997   | 212::58  | 174::8   | 0.007063389 | cassette  |
| SREK1    | chrz:20743173-20743270   | 5::96    | 43::56   | 0.007074823 | Undefined |



|                    |                          |             |               |             |           |
|--------------------|--------------------------|-------------|---------------|-------------|-----------|
| IMPDH2             | chr12:11622485-11622556  | 322::467    | 486::103      | 0.007237341 | cassette  |
| ENSGALG00000004133 | 23:5573373-5573396       | 0::46       | 18::1         | 0.007337328 | alt3      |
| RCBTB1             | chr1:168557474-168557533 | 41::23      | 32::3         | 0.007351101 | cassette  |
| MTM1               | chr4:17706055-17706108   | 31::0       | 30::10        | 0.007422496 | cassette  |
| RAB24              | 13:9529264-9529552       | 38::0       | 118::133      | 0.007796516 | alt3      |
| FKBP14             | chr2:34430018-34430096   | 69::22      | 32::41        | 0.008083602 | cassette  |
| PNRC2              | 23:5576823-5576890       | 43::107     | 5::62         | 0.008189894 | alt3      |
| TUBGCP5            | chr1:129712351-129712461 | 41::2       | 32::20        | 0.008236659 | cassette  |
| NF2                | chr15:11066823-11066867  | 169::124    | 254::74       | 0.008305831 | cassette  |
| GPLD1              | chr2:57940708-57940825   | 26::16      | 21::1         | 0.00890215  | cassette  |
| EHMT1              | chr17:2054308-2054451    | 121::20     | 123::60       | 0.009900268 | cassette  |
| LRCH3              | chr9:14555834-14555926   | 143::25     | 184::65       | 0.01131466  | cassette  |
| ARHGAP17           | chr14:6567229-6567276    | 109::166    | 97::20        | 0.011341526 | cassette  |
| VPS33B             | chr10:19554214-19554622  | 92::109::17 | 175::287::112 | 0.011811838 | Undefined |
| SBF2               | chr5:8437715-8437789     | 15::0       | 13::12        | 0.012335786 | cassette  |
| CEP44              | chr4:43149697-43149749   | 11::3       | 6::17         | 0.012462488 | cassette  |
| C1H11orf30         | chr1:192888714-192888868 | 25::44      | 12::65        | 0.012512811 | cassette  |
| ELMO1              | chr2:46933639-46933776   | 57::53      | 40::91        | 0.012952994 | cassette  |
| MAP4               | chr2:696865-696993       | 101::170    | 91::76        | 0.013044062 | cassette  |
| HMGXB4             | chr1:51990924-51990930   | 0::87       | 17::24        | 0.013103816 | cassette  |
| BIVM               | chr1:142029884-142029955 | 178::92     | 190::158      | 0.013661148 | cassette  |
| PAPD4              | chrz:22073017-22073103   | 39::76      | 24::107       | 0.013962925 | cassette  |
| PCM1               | chr4:62447489-62447659   | 8::102      | 21::42        | 0.014079953 | cassette  |
| EHMT1              | chr17:2044766-2044954    | 20::65      | 17::143       | 0.014267655 | cassette  |
| TCOF1              | chr13:12476124-12476297  | 477::549    | 391::279      | 0.014721754 | cassette  |

|              |                                  |          |          |             |                    |
|--------------|----------------------------------|----------|----------|-------------|--------------------|
| AGL          | chr8:11021058-11021183           | 56::2    | 45::14   | 0.015169638 | cassette           |
| VPS13B       | chr2:127973250-127973268         | 2::10    | 6::0     | 0.015299826 | alt5               |
| MAP7D3       | chr4:4225622-4225720             | 98::125  | 119::74  | 0.015320293 | cassette           |
| RBFOX2       | chr1:51818455-51818508           | 7::22    | 2::46    | 0.015348726 | cassette           |
| ZNF706       | chr2:128506092-128506129         | 37::659  | 166::560 | 0.016001794 | alt5               |
| RALGAPA1     | chr5:35520990-35521020           | 14::28   | 20::11   | 0.01665272  | cassette           |
| MBNL1        | chr9:22851960-22852054           | 107::407 | 148::325 | 0.016833581 | cassette           |
| NISCH        | chr12:565290-565406              | 8::0     | 4::18    | 0.016949263 | mutually_exclusive |
| BBX          | chr1:86694602-86694682           | 7::55    | 35::56   | 0.017074685 | cassette           |
| ZYX          | chr1:77018753-77018845           | 90::46   | 45::57   | 0.017262556 | cassette           |
| PPP3CB       | chr6:15746118-15746147           | 96::227  | 57::382  | 0.017534165 | cassette           |
| TMEM156      | chr4:69076352-69076402           | 188::164 | 205::94  | 0.017608468 | cassette           |
| RIF1         | chr7:34670710-34670787           | 40::173  | 76::123  | 0.017640415 | cassette           |
| PHF20        | chr20:906237-906515              | 16::158  | 53::139  | 0.017665313 | Undefined          |
| PSEN1        | chr5:25694773-25694826           | 382::254 | 319::460 | 0.017758277 | cassette           |
| VDAC2        | chr6:14420491-14420545           | 79::11   | 71::48   | 0.0177604   | cassette           |
| ATAD2B       | chr3:103687022-103687083         | 46::4    | 52::32   | 0.018369649 | cassette           |
| TRIM33       | chr26:3788530-3788580            | 80::134  | 131::159 | 0.020037418 | cassette           |
| BLVRA        | chr2:52209915-52210086           | 12::21   | 11::84   | 0.020118679 | cassette           |
| MAP4K5       | chr5:57706279-57706323           | 14::11   | 42::2    | 0.020122496 | cassette           |
| TMEM16E      | chr5:2751365-2751409             | 6::10    | 5::42    | 0.021040507 | cassette           |
| LOC100858086 | chr3:54492761-54493286           | 112::21  | 11::88   | 0.021329717 | alt3               |
| CERS5        | lge22c19w28_e50c23:287258-287492 | 8::0     | 6::10    | 0.021381442 | alt3               |
| UBXN2A       | chr3:103726849-103727041         | 19::1    | 10::8    | 0.021693631 | cassette           |
| ASB9         | chr1:121515530-121515680         | 6::19    | 1::34    | 0.021819143 | cassette           |

|            |                                   |          |          |             |               |
|------------|-----------------------------------|----------|----------|-------------|---------------|
| DBT        | chr8:10861196-10861362            | 0::27    | 8::9     | 0.022298728 | cassette      |
| ANXA10     | chr4:24382201-24382333            | 8::8     | 24::4    | 0.022337132 | cassette      |
| KLHDC10    | chr1:866016-866063                | 17::36   | 11::72   | 0.022548736 | cassette      |
| ANKHD1     | chr13:1057559-1058302             | 22::38   | 39::23   | 0.024094827 | cassette      |
| ANGPT1     | chr2:130970200-130970288          | 4::13    | 8::0     | 0.024795255 | cassette      |
| SNX14      | chr3:76351237-76351263            | 107::60  | 133::27  | 0.024977105 | cassette      |
| KTN1       | chr5:55992839-55992922            | 12::144  | 20::100  | 0.025047576 | cassette      |
| GIT2       | chr15_jh375192_random:60606-60695 | 166::136 | 174::76  | 0.02551801  | cassette      |
| BCLAF1     | 3:54492761-54493286               | 111::27  | 7::91    | 0.025640059 | alt3          |
| TUBGCP2    | chr6:8903470-8903638              | 15::40   | 1::74    | 0.025832341 | cassette      |
| PTPRC      | chr8:2045308-2045445              | 244::712 | 28::1383 | 0.025837247 | cassette      |
| ZZEF1      | chr19:3244567-3244585             | 59::0    | 35::16   | 0.02589455  | alt3          |
| PCYT2      | chr18:10234270-10234345           | 78::4    | 86::29   | 0.02623215  | cassette      |
| ATG13      | chr5:22793477-22793575            | 28::100  | 21::181  | 0.026293096 | cassette      |
| PROSER1    | chr1:170544310-170544375          | 11::51   | 3::80    | 0.026812788 | cassette      |
| C28H19orf6 | chr28:2819021-2819075             | 44::0    | 27::6    | 0.026830556 | alt5          |
| PTRHD1     | chr3:105096408-105096491          | 73::20   | 116::12  | 0.027158141 | cassette      |
| DCX        | chr4:13249337-13249352            | 21::22   | 8::0     | 0.027418007 | alt5          |
| ATG16L1    | chr9:696583-696639                | 37::48   | 22::64   | 0.027599695 | cassette      |
| MEF2A      | chr10:16547260-16547397           | 210::190 | 142::294 | 0.028243093 | cassette      |
| CRKL       | 15:8265460-8265478                | 27::170  | 0::80    | 0.028294434 | alt3          |
| IDI1       | chr2:10372960-10373419            | 543::308 | 543::745 | 0.028400116 | retain_intron |
| INCENP     | chr5:16401957-16402070            | 323::453 | 261::801 | 0.028558215 | cassette      |
| KIAA1530   | chr4:84025954-84026014            | 35::3    | 21::11   | 0.028618104 | cassette      |
| ZNF341     | chr20:2457039-2457143             | 16::11   | 8::25    | 0.029116067 | cassette      |

|          |                                     |          |          |             |           |
|----------|-------------------------------------|----------|----------|-------------|-----------|
| OPA1     | chr9:12544358-12544468              | 21::59   | 16::119  | 0.029317093 | cassette  |
| MDM2     | chr1:35261089-35261344              | 23::0    | 18::7    | 0.029410293 | cassette  |
| DTX2     | chr19:4190634-4190765               | 50::26   | 50::8    | 0.029822452 | cassette  |
| EPB41    | 23:2578012-2578029                  | 19::12   | 99::0    | 0.030135461 | alt3      |
| MAT1A    | chr6:3916128-3916290                | 17::12   | 5::27    | 0.030155396 | cassette  |
| CASC4    | chr10:19316145-19316312             | 263::124 | 162::134 | 0.030186621 | cassette  |
| CPSF6    | chr1:35357856-35357948              | 275::146 | 272::251 | 0.030354887 | cassette  |
| UNK      | chr18:4654011-4654058               | 28::47   | 11::66   | 0.030540041 | cassette  |
| PNPLA6   | chrn_aadn03027100:4216-4380         | 26::0    | 10::5    | 0.030658042 | alt3      |
| ARHGAP17 | chr14:6565266-6565310               | 160::41  | 109::6   | 0.030834567 | cassette  |
| BPTF     | chr18:6987883-6988044               | 163::60  | 144::106 | 0.030835951 | cassette  |
| ADARB1   | chr7:7271419-7271483                | 11::8    | 11::36   | 0.030936469 | cassette  |
| LIN9     | chr3:16410115-16410125              | 19::13   | 35::3    | 0.030990087 | alt5      |
| SFPQ     | chr23:4353931-4354048               | 99::193  | 79::99   | 0.031563062 | Undefined |
| SNX13    | chr2:29122018-29122098              | 77::6    | 42::15   | 0.031573186 | cassette  |
| LIN54    | chr4:45724039-45724194              | 83::9    | 62::25   | 0.032213175 | cassette  |
| DEPDC5   | chr15:8859611-8859727               | 21::7    | 42::2    | 0.034078523 | cassette  |
| ZNF407   | chr2:91799459-91799512              | 9::10    | 13::1    | 0.034845501 | cassette  |
| DDX26B   | chr4:4132849-4132929                | 51::1    | 43::20   | 0.034913219 | cassette  |
| FAM76B   | chr1:184508642-184508722            | 72::80   | 90::155  | 0.035399748 | cassette  |
| ZDHHC14  | chr3:50907794-50907806              | 122::8   | 48::11   | 0.036064719 | alt5      |
| MKI67    | chr6:32893586-32893601              | 0::77    | 37::88   | 0.036117136 | alt3      |
| SLC1A4   | 3:9807250-9807329                   | 13::21   | 40::37   | 0.036125254 | alt3      |
| ATF1     | chr1ge22c19w28_e50c23:146287-146363 | 20::113  | 19::239  | 0.036389919 | cassette  |
| INTU     | chr4:33736068-33736154              | 44::0    | 27::6    | 0.036450216 | cassette  |

|          |                          |         |         |             |                    |
|----------|--------------------------|---------|---------|-------------|--------------------|
| ZNF217   | chr20:12874597-12874722  | 2::113  | 13::108 | 0.036934939 | cassette           |
| OGT      | chr4:2193402-2193432     | 88::62  | 123::30 | 0.03698717  | alt3               |
| MTMR14   | chr12:11441665-11441820  | 77::171 | 74::81  | 0.037043324 | cassette           |
| PPP2R2D  | chr6:34313353-34313450   | 10::103 | 25::94  | 0.037325535 | Undefined          |
| LRP8     | chr8:23579431-23579553   | 1::28   | 3::1    | 0.037845518 | cassette           |
| CHD1     | chrz:51138417-51138680   | 19::59  | 21::34  | 0.038259004 | cassette           |
| GBE1     | chr1:94624127-94624189   | 14::0   | 2::11   | 0.038534116 | cassette           |
| CDKN2AIP | chr4:39281330-39281361   | 43::45  | 34::85  | 0.039534738 | alt5               |
| CRTC1    | chr28:3586998-3587099    | 33::17  | 45::20  | 0.040126567 | cassette           |
| DCUN1D2  | chr1:136737893-136737989 | 10::2   | 3::8    | 0.040129344 | cassette           |
| U2SURP   | chr9:10110769-10110810   | 88::150 | 115::90 | 0.041468846 | cassette           |
| SAAL1    | chr5:11868618-11868642   | 34::6   | 41::0   | 0.041671631 | alt5               |
| CIRH1A   | 11:18360385-18360426     | 158::72 | 40::40  | 0.041783217 | alt3               |
| TIAL1    | chr6:29789920-29789971   | 53::157 | 78::106 | 0.041922553 | alt3               |
| PPP2R5C  | chr5:49284040-49284163   | 79::18  | 126::31 | 0.042679818 | cassette           |
| FAM107B  | chr1:7218739-7218852     | 69::11  | 66::1   | 0.042809815 | cassette           |
| RNF149   | chr1:132823237-132823266 | 49::84  | 78::52  | 0.042896094 | cassette           |
| UBR2     | chr3:22338664-22338762   | 47::49  | 60::40  | 0.043248631 | mutually_exclusive |
| DOCK10   | chr9:8015337-8015352     | 10::14  | 5::48   | 0.043754113 | alt3               |
| TRERF1   | chr3:22206820-22207008   | 30::155 | 21::173 | 0.044076746 | cassette           |
| MEF2A    | chr10:16547063-16547194  | 211::64 | 143::82 | 0.044867946 | mutually_exclusive |
| ATG4C    | chr8:26499100-26499169   | 13::0   | 12::9   | 0.045712468 | alt5               |
| SEC16A   | chr17:7871154-7871213    | 33::45  | 58::29  | 0.046019996 | cassette           |
| CCNL1    | chr9:22238440-22238512   | 84::66  | 91::54  | 0.047654712 | cassette           |
| HPRT1    | chr4:4014253-4014270     | 19::662 | 40::675 | 0.048052692 | cassette           |

|             |                                  |        |        |             |      |
|-------------|----------------------------------|--------|--------|-------------|------|
| LOC421259   | chr3:5333911-5333920             | 2::0   | 0::7   | 0.049115572 | alt5 |
| XLOC_018851 | chr8_jh375182_random:45431-45585 | 40::27 | 76::18 | 0.049920647 | alt5 |

Abbreviations: Ex: exclusion, In: inclusion

**Supplementary Table S2. List of validated and significantly changed splicing events regulated by SRSF10**

| <b>Gene</b>      | <b>Description</b>                                                                   | <b>AS type</b> | <b>annotation&amp;</b> |
|------------------|--------------------------------------------------------------------------------------|----------------|------------------------|
| <b>EIF4ENIF1</b> | eukaryotic translation initiation factor 4E<br>nuclear import factor 1               | exon inclusion | A+U                    |
| <b>CAST</b>      | calpastatin                                                                          | exon inclusion | A+U                    |
| <b>CASP1</b>     | caspase 1, apoptosis-related cysteine<br>peptidase (interleukin 1, beta, convertase) | exon inclusion | A+U                    |
| <b>MBNL2</b>     | muscleblind-like 2 (Drosophila)                                                      | exon inclusion | A+A                    |
| <b>HSF2</b>      | heat shock transcription factor 2                                                    | exon inclusion | A+A                    |
| <b>CRTC1</b>     | CREB regulated transcription coactivator 1                                           | exon inclusion | A+U                    |
| <b>PHF20L1</b>   | PHD finger protein 20-like 1                                                         | exon inclusion | A+U                    |
| <b>LRRFIP2</b>   | leucine rich repeat (in FLII) interacting<br>protein 2                               | exon inclusion | A+A                    |
| <b>CHD1</b>      | chromodomain helicase DNA binding<br>protein 1                                       | exon inclusion | A+A                    |
| <b>TRERF1</b>    | transcriptional regulating factor 1                                                  | exon inclusion | A+U                    |
| <b>CCNL1</b>     | cyclin L1                                                                            | exon inclusion | A+U                    |
| <b>TRIM33</b>    | tripartite motif containing 33                                                       | exon inclusion | A+U                    |
| <b>PCM1</b>      | pericentriolar material 1                                                            | exon inclusion | A+A                    |

|                |                                                                               |                |     |
|----------------|-------------------------------------------------------------------------------|----------------|-----|
| <b>DBT</b>     | dihydrolipoamide branched chain transacylase E2                               | exon inclusion | A+A |
| <b>LRP8</b>    | low density lipoprotein receptor-related protein 8, apolipoprotein e receptor | exon inclusion | A+A |
| <b>EPRS</b>    | glutamyl-prolyl-tRNA synthetase                                               | exon exclusion | A+A |
| <b>KDM6A</b>   | lysine (K)-specific demethylase 6A                                            | exon exclusion | A+U |
| <b>CEP44</b>   | centrosomal protein 44kDa                                                     | exon exclusion | A+U |
| <b>L3MBTL2</b> | l(3)mbt-like 2 (Drosophila)                                                   | exon exclusion | A+U |
| <b>MDM4</b>    | Mdm4 p53 binding protein homolog (mouse)                                      | exon exclusion | A+U |
| <b>PCYT2</b>   | phosphate cytidylyltransferase 2, ethanolamine                                | exon exclusion | A+U |
| <b>SEC16A</b>  | SEC16 homolog A ( <i>S. cerevisiae</i> )                                      | exon exclusion | A+U |
| <b>PTPRC</b>   | protein tyrosine phosphatase, receptor type, C                                | exon exclusion | A+U |
| <b>FKBP14</b>  | FK506 binding protein 14, 22 kDa                                              | exon exclusion | A+U |
| <b>TUBGCP5</b> | tubulin, gamma complex associated protein 5                                   | exon exclusion | A+U |
| <b>NCAPG2</b>  | non-SMC condensin II complex, subunit G2                                      | exon exclusion | A+U |
| <b>ZNF341</b>  | zinc finger protein 341                                                       | exon exclusion | A+A |
| <b>PIP5K1B</b> | phosphatidylinositol-4-phosphate 5-kinase, type I, beta                       | exon exclusion | A+U |
| <b>CDK13</b>   | cyclin-dependent kinase 13                                                    | alternative 3' | A+U |
| <b>SLTM</b>    | SAFB-like, transcription modulator                                            | alternative 5' | A+U |
| <b>BAP1</b>    | BRCA1 associated protein-1 (ubiquitin carboxy-terminal hydrolase)             | alternative 5' | A+U |

**RBP5**      retinoblastoma binding protein 5      alternative 5'      A+U

#: Note that these exons map to Gallus4.0.

**Supplementary Table S3: list of primer pairs used for identification of SRSF10-regulated splicing events**

| <b>Gene Symbol</b> | <b>primer-F</b>          | <b>primer-R</b>          |
|--------------------|--------------------------|--------------------------|
| <b>EIF4ENIF1</b>   | GTCGTTCTGGAAGTCGGTCAA    | TGGGCTGTGAAGGTAGGGTC     |
| <b>CAST</b>        | AAGAAAAGAAACCTGCTGTGGA   | AAAATCCCTTTGTCAAACCTTC   |
| <b>CASP1</b>       | GGCAAACCCAAAGTGGTCATT    | CGGAACATCTCCTGCAAGTCA    |
| <b>MBNL2</b>       | AAAAGGTCGTTGCATGAGGG     | AGGGAGGCTTCGTGGCACTC     |
| <b>HSF2</b>        | TCAGGACGACAGTTCAGCATAG   | GACCAGCATTACTCTTGGTAGTTT |
| <b>CRTC1</b>       | GTGGCGATGGATGCGTTGT      | TGATGGGATAGGGCATTAGC     |
| <b>PHF20L1</b>     | ACCCTGTCTCCCTCTTGATTT    | CTTTTCCTTTTCTTTCCACTC    |
| <b>LRRFIP2</b>     | GATGCCTCGCTCAGTGAATTA    | TTCCCTGTGGTACTCTGCTATT   |
| <b>CHD1</b>        | ATTCTTCACCACAACCCTCAG    | TTTCAGTGCTGCTTTGACAGG    |
| <b>TRERF1</b>      | AGTTTGCCTGCTCTGAATGGT    | CTGTGCCGATACTTCTTCTTGT   |
| <b>CCNL1</b>       | CAACGTGTTTCACCACCTGAG    | ACCCTCCTTTCTGCTTTGATTAC  |
| <b>TRIM33</b>      | TGTGGCTGATGTCCGGTTGAT    | GCTGGAAGGTCCTGTCTGGGT    |
| <b>PCM1</b>        | GGGAGCCACTGCAATGTAAAG    | CGGAATCATCCACAACAGCAA    |
| <b>DBT</b>         | AACAAACAGGAGCTATCCTACC   | TTGACAGCCTTCATCCAAAGA    |
| <b>LRP8</b>        | CTGACAACAGTGACGAGGCA     | GGCATTACATTCGTAGCCT      |
| <b>EPRS</b>        | GAGACATGAAGAGCCAACA      | GATCCAATCCTCGCACTCA      |
| <b>KDM6A</b>       | GTTGTGTTTTAGTCGGATACC    | GTCCTGACCAGTCCAGTAGATG   |
| <b>CEP44</b>       | AGATTCGGGCGCCTGAG        | TGCGAAGTCCTTGTTCTATTTT   |
| <b>L3MBTL2</b>     | GCAGAGGAATCGTAGGTA AAACT | CCAAAACCGTCCATTGAAAAAAG  |
| <b>MDM4</b>        | ATCCAAGCCCAGTCTATGAG     | TGAAACAATGGCAGTGTCTAT    |



|                |                           |                           |
|----------------|---------------------------|---------------------------|
| <b>PCYT2</b>   | GTCCACTTTGGGGAGAAGG       | CTCGGCCAGCGCGAAGATG       |
| <b>SEC16A</b>  | AAGATTTCTACAGCAGAATGGCTAG | TGGAACAGGTGGAGAAGGAGG     |
| <b>PTPRC</b>   | TCTGACTTCTGGCAAATGGTA     | CGACTAAATCTTTGGGGTCTT     |
| <b>FKBP14</b>  | GGAATGGACCCAGGTCTCAT      | AACCCATCACTGTCTTCATCTTCT  |
| <b>TUBGCP5</b> | TGATTCTCCATCTAACACCACC    | CTTCCAACAATACTTTCCCCA     |
| <b>NCAPG2</b>  | TACCCGACAGAAGACGTAACGAA   | CCAACCCTAACGACAAATCAAAG   |
| <b>ZNF341</b>  | GGGAAGTTGTGCGTTGCT        | GAAGTTCTTTCGCCGGGAG       |
| <b>PIP5K1B</b> | GCTCCAGATGACTTGCCTTGT     | TTGGCTTTCCAGCAGTAACAT     |
| <b>CDK13</b>   | GCATGCAAACCTCTTCCCAACT    | TTTTCTTCTCCTCCAACACCA     |
| <b>SLTM</b>    | GTAAGAAGGCAAGAAAACAGAAG   | GTTTGGTCAAGAACTACAACGTGA  |
| <b>BAP1</b>    | GTTTGATGGAAGGGGGGGAG      | CTGAAGTGTGTGGAGGCGGA      |
| <b>RBBP5</b>   | TTAGGTTCTTCTTCGTTTCGTCC   | TCTCCGTTAATTCTTCTTGCT     |
| <b>HPRT1</b>   | TATAAAAGTCATTGGTGGGGATG   | CGTTTTCATTGTTTTCCAGTAT    |
| <b>MAT1A</b>   | GTCCTGCTCAGAAAGAACCCT     | CAGTACAGCATCGCTGATTTG     |
| <b>MAP4K5</b>  | TTGCATTGGAATCCTTTTGT      | CAGGGAAGTGTTTTATCGTCTCAG  |
| <b>MDM2</b>    | GCAACTTCCCAGCCAACAA       | CCCGCTCACCACACACCAT       |
| <b>ZZEF1</b>   | TGGAAGATAACATTACCCCAACA   | TCTGAGAGCACTCAGCAAAAAC    |
| <b>ZYX</b>     | CCCTGTGGAACATCAAGACGA     | CTCCCTTGGAATACGAATACTGCTA |
| <b>PPP2R5C</b> | CGCCAGAGTTCATCAAGGTTTA    | TGCTCGTTTTACTTCCTTCCAC    |
| <b>IDI1</b>    | TCCTTCAGGGGCGGTGCT        | GTGGCAGTTTTTCTTCGTGTCC    |
| <b>INTS4</b>   | GCGGGTGTATGAGGAGTTCAC     | CTCTCCACTTCCACAGGCTTC     |
| <b>MKS1</b>    | AGGAGCCTACTGGATTGAGC      | TCGTCCTCTTGGGTGATAAA      |
| <b>UBR2</b>    | ATGGCCTTCGTCGAGTATTGT     | AAACTGAAACCTGCCTTGGAT     |
| <b>MEF2A</b>   | ATACAACGAGCCCCATGAAA      | GACACTGGAACCGTAACCGA      |

---
